# Supplementary material
Source: publisher figshare collection journal article supplement (https://gsapubs.figshare.com/articles/dataset/_/12555566)
Supplement: Supplementary file 1 [file 1]

## GSA data repository

### I-Metavolcanic rock classification:

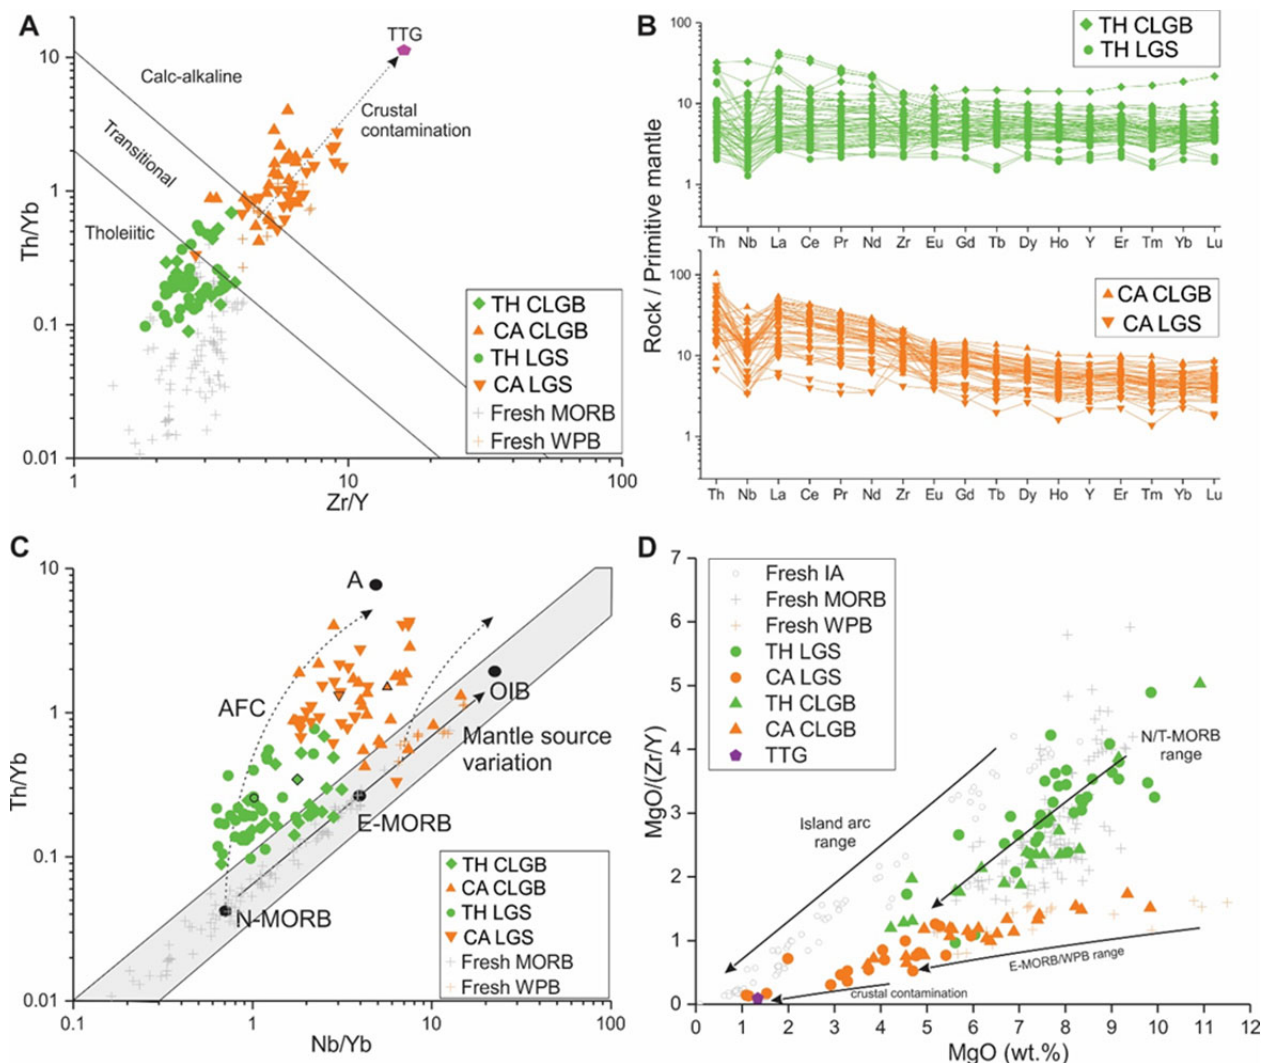

Figure DR1. Discrimination diagrams of the metavolcanic rocks sampled from La Grande subprovince (LGS) and Central Lapland greenstone belt (CLGB). A) Th/Yb-Zr/Y, TH = tholeiitic; CA = calc-alkaline, WPB = within plate basalt, modified from Ross and Bédard (2009). TTG = tonalite-trondhjemite-granodiorite. B) REE profiles normalize to primitive mantle values from Sun and McDonough (1989). C) Nb/Yb-Th/Yb, the variations are due to differences in mantle source and in degree of assimilation and fractional crystallization. A = Archean crust; black-bordered symbols are average values of each group; AFC = assimilation-fractionation-crystallization; modified from Pearce et al. (2008). D) MgO-MgO/(Zr/Y), IA= island arc, TTG data from Chekulaev and Glebovitsky (2017). All fresh MORB, WPB and IA data from Jenner and O'Neill (2012), Tatsumi et al. (1999), Regelous et al. (2014), Park et al. (2010). The La Grande tholeiitic series correspond to the mafic sub-group I and II of the Yasinsky, Guyer and Laforge groups (Sappin et al., 2018). They are the erupted volcanic products of primitive mantle-derived Mg-rich magmas which underwent limited crustal contamination while the La Grande calc-alkaline series, dominantly present in the Yasinsky and Guyer groups, are not arc-related and most likely formed from advanced crustal contamination of plume-derived melt through assimilation-fractionation-crystallization processes. The Lapland tholeiitic series from the Kittilä suite correspond to the Vesmajärvi formation, a

sub-marine N-MORB to E-MORB volcanic rock sequence with limited Archean crustal contamination, and those from the Savukoski group to the Matarakoski and Linkupalo formations which are mafic volcanic units with limited crustal contamination (Hanski and Huhma, 2005). The Lapland calc-alkaline series correspond to the Kautoselkä formation, a plume-related within plate basalt volcanic sequence with moderate Archean crustal contamination (Hanski and Huhma, 2005).

## II-Protolith power law regression curves:

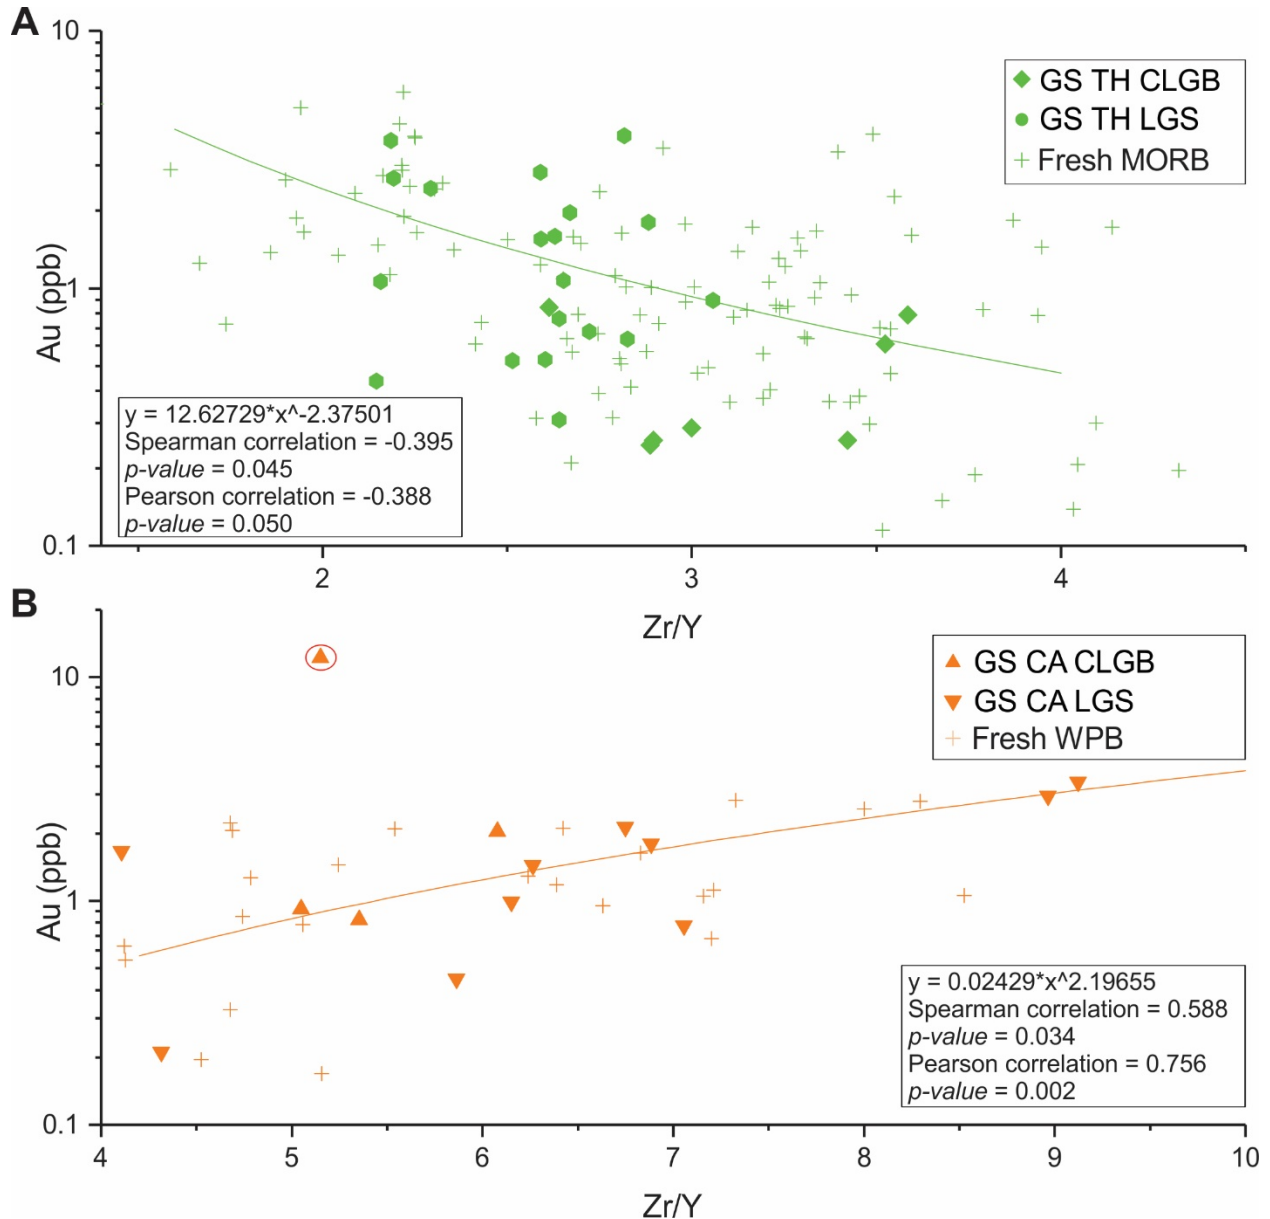

Figure DR2. Au-Zr/Y of greenschist facies samples from La Grande subprovince (LGS) and Central Lapland greenstone belt (CLGB) for A) tholeiitic and B) calc-alkaline magmatic series. The lines are the power law regression curves calculated from the greenschist facies samples and depict the protolith Au composition. The scatter in the greenschist tholeiitic samples is due to the primary magmatic scattered distribution of Au as shown by the fresh glass distribution. One sample in the calc-alkaline magmatic series is defined as an outlier (circled, 12.2 ppb Au, Fig. 1) and is not used for power law regression

curves calculation. Fresh MORB and WPB (within plate basalt) glass data are from Jenner and O'Neill (2012) and Tatsumi et al. (1999).

### III-Effect of alteration before metamorphism:

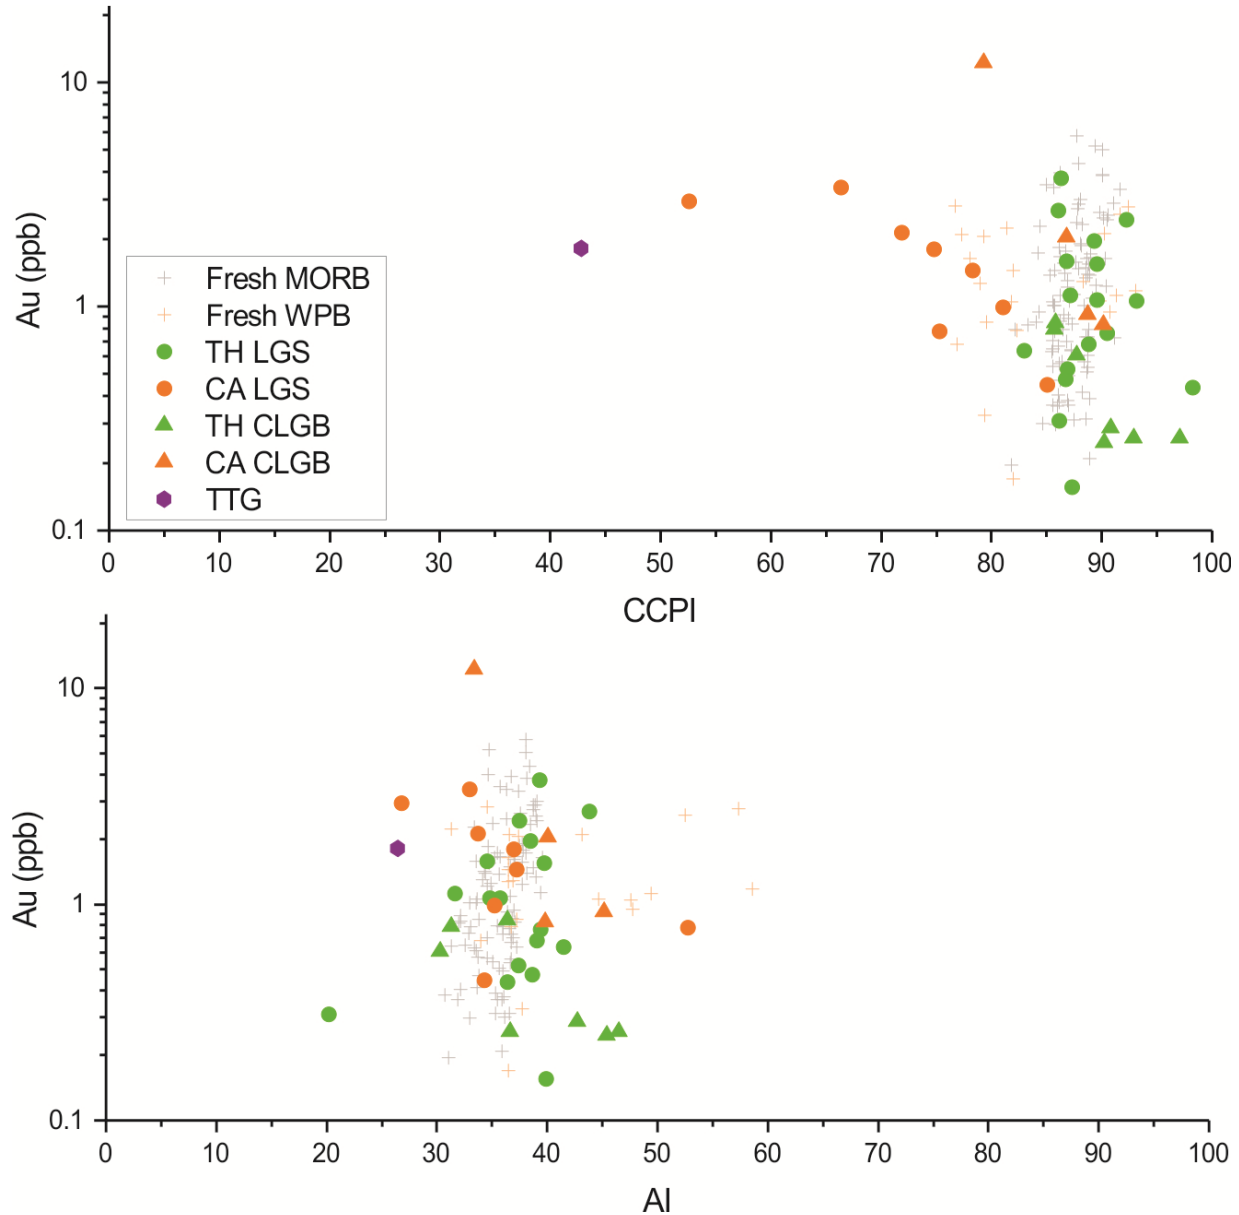

Figure DR3. A) Au-CCPI (chlorite-carbonate-pyrite index) and B) Au-AI (Ishakawa alteration) diagrams for greenschist facies samples from La Grande subprovince (LGS) and Central Lapland greenstone belt (CLGB). The lack of correlation between Au and the alteration indexes implies limited Au mobilization during seafloor alteration. The shift of CCPI values for the CA samples from La Grande are due to crustal contamination (addition of  $\text{Na}_2\text{O}$  and  $\text{K}_2\text{O}$ ). Adapted from Large et al. (2001). Fresh MORB and WPB glass data from Jenner and O'Neill (2012) and Tatsumi et al. (1999).

## References:

- Chekulaev, V.P., Glebovitsky, V.A., 2017. Average composition of the tonalite–trondhjemite–granodiorite association: Possibilities of application, in: *Doklady Earth Sciences*. Springer, pp. 78–82.
- Hanski, E., Huhma, H., 2005. Central Lapland greenstone belt, in: Lehtinen, M., Nurmi, P.A., Rämö, O.T. (Eds.), *Precambrian Geology of Finland - Key to the Evolution of the Fennoscandian Shield*. Elsevier B. V., pp. 139–194.
- Jenner, F.E., O'Neill, H.S.C., 2012. Major and trace analysis of basaltic glasses by laser-ablation ICP-MS. *Geochemistry, Geophys. Geosystems* 13.
- Large, R.R., Gemmell, J.B., Paulick, H., Huston, D.L., 2001. The alteration box plot: A simple approach to understanding the relationship between alteration mineralogy and lithogeochemistry associated with volcanic-hosted massive sulfide deposits. *Econ. Geol.* 96, 957–971.
- Molnár, F., Middleton, A., Stein, H., Hugh, Ob., Lahaye, Y., Huhma, H., Pakkanen, L., Johanson, B., 2018. Repeated syn-and post-orogenic gold mineralization events between 1.92 and 1.76 Ga along the Kiistala Shear Zone in the Central Lapland Greenstone Belt, northern Finland. *Ore Geol. Rev.* 101, 936–959.
- Park, S.H., Lee, S.M., Kamenov, G.D., Kwon, S.T., Lee, K.Y., 2010. Tracing the origin of subduction components beneath the South East rift in the Manus Basin, Papua New Guinea. *Chem. Geol.* 269, 339–349. <https://doi.org/10.1016/j.chemgeo.2009.10.008>
- Regelous, M., Haase, K.M., Freund, S., Keith, M., Weinzierl, C.G., Beier, C., Brandl, P.A., Endres, T., Schmidt, H., 2014. Formation of the Troodos Ophiolite at a triple junction: Evidence from trace elements in volcanic glass. *Chem. Geol.* 386, 66–79. <https://doi.org/10.1016/j.chemgeo.2014.08.006>
- Ross, P.-S., Bédard, J.H., 2009. Magmatic affinity of modern and ancient subalkaline volcanic rocks determined from trace-element discriminant diagrams. *Can. J. Earth Sci.* 46, 823–839.
- Sappin, A.-A., Guilmette, C., Goutier, J., Beaudoin, G., 2018. Geochemistry of Mesoarchean felsic to ultramafic volcanic rocks of the Lac Guyer area, La Grande Subprovince (Canada): Evidence for plume-related magmatism in a rift setting. *Precambrian Res.* 316, 83–102.
- Sun, S.-S., McDonough, W.F., 1989. Chemical and isotopic systematics of oceanic basalts: implications for mantle composition and processes. *Geol. Soc. London, Spec. Publ.* 42, 313–345.
- Tatsumi, Y., Oguri, K., Shimoda, G., 1999. The behaviour of platinum-group elements during magmatic differentiation in Hawaiian tholeiites. *Geochem. J.* 33, 237–247.
