# Supplementary material
Source: publisher figshare collection journal article supplement (https://gsapubs.figshare.com/articles/dataset/_/12555566)
Supplement: Supplementary file 1 [file 1]

## Sheet: Table S1
Sampling sample No	Greenstone Belt	Group	Easting	Norhting	Metamorphic fascies	Magmatic series	SiO2	Al2O3	Fe2O3	MgO	CaO	Na2O	K2O	TiO2	P2O5	MnO	Total	LOI	Y	Zr	Nb	La	Ce	Pr	Nd	Eu	Gd	Tb	Dy	Ho	Er	Tm	Yb	Lu	Au	Th		Zr/Y	Th/Yb		Au calc	Dif Au	Dif Au%	Au²		Normalized	Th	Nb	La
							%	%	%	%	%	%	%	%	%	%	%	%	ppm	ppm	ppm	ppm	ppm	ppm	ppm	ppm	ppm	ppm	ppm	ppm	ppm	ppm	ppm	ppm	ppb	ppm										Sun and McDonough (1989) Primitive mantle values	0.085	0.713	0.687
FEMO-2016-2.01	Lapland	Kittila	3390780	7526189	Greenschist	Tholeitic	48.7082	15.0562	15.7137	8.30614	7.82399	1.78615	0.0438319	1.31496	0.0876637	0.219159	99.06	8.66	20.4914	70.131	3.83529	3.50655	9.42385	1.46837	7.23226	1.1725	3.32026	0.53694	3.99966	0.843763	2.52033	0.372571	2.24638	0.372571	0.257295	0.317781		3.42246	0.141463		0.679597	0.422301	-62.14	0.178338			3.7386	5.37909	5.10415
FEMO-2016-2.02	Lapland	Kittila	3390780	7526189	Greenschist	Tholeitic	48.5663	15.3597	15.3389	7.15955	7.52377	2.19573	0.0832506	1.56095	0.11447	0.187314	98.09	3.83	31.219	93.6569	5.0991	6.13973	15.6095	2.32061	12.4876	1.4881	5.27601	0.874131	5.54657	1.1447	3.27799	0.520316	2.83052	0.437066	0.286808	0.489097		3	0.172794		0.929271	0.642463	-69.1362	0.412758			5.75408	7.15161	8.93702
FEMO-2016-6.02	Lapland	Kittila	3425967	7552430	Greenschist	Tholeitic	49.8432	13.6263	18.1136	4.22034	7.37276	2.88544	0.246443	1.94074	0.195101	0.236175	98.68	2.58	41.3819	145.812	9.65236	9.75505	24.9524	3.6145	17.5591	1.83806	6.42806	1.1398	7.1982	1.55054	4.57974	0.687988	3.95336	0.595571	0.606313	0.811209		3.52357	0.205195		0.63419	0.0278771	-4.3957	0.000777133			9.54364	13.5377	14.1995
FEMO-2016-6.05	Lapland	Kittila	3425967	7552430	Greenschist	Tholeitic	49.7065	14.2428	17.1077	4.6862	7.14186	3.47884	0.153478	1.97475	0.133014	0.21487	98.84	2.24	31.1049	111.528	6.85536	6.65072	16.5757	2.53751	12.3806	1.21759	4.87038	0.849246	5.70939	1.23806	3.50954	0.562754	3.36629	0.49113	0.786624	0.654841		3.58553	0.194529		0.608473	-0.178151	29.2784	0.0317378			7.70401	9.61481	9.68082
FEMO-2016-9.01	Lapland	Kittila	3435989	7529642	Greenschist	Tholeitic	50.2847	14.3582	14.8561	6.18315	10.1358	0.601715	0.0311232	1.30718	0.103744	0.228237	98.09	3.54	26.8697	77.808	3.11232	4.46099	11.3081	1.76365	8.7145	1.18268	4.32613	0.726208	4.56474	0.902573	3.09157	0.321607	2.64547	0.394227	0.25734	0.446099		2.89575	0.168627		1.0107	0.753359	-74.5384	0.56755			5.24823	4.36511	6.49344
FEMO-2016-9.03	Lapland	Kittila	3435989	7529642	Greenschist	Tholeitic	53.0075	13.2287	13.1875	7.86097	7.30462	2.21508	0.0618163	1.20542	0.0927244	0.195752	98.36	2.89	24.6235	71.0887	2.47265	3.3999	9.16941	1.5145	7.41795	0.896336	3.67807	0.618163	4.07987	0.896336	2.78173	0.3812	2.49326	0.3812	0.245919	0.3812		2.88703	0.152893		1.01797	0.772048	-75.8421	0.596059			4.48471	3.46795	4.9489
FEMO-2016-9.04	Lapland	Kittila	3435989	7529642	Greenschist	Tholeitic	50.8846	14.2289	12.3956	7.66654	10.3332	3.22911	0.0833319	0.947901	0.062499	0.20833	100.04	4	20.7288	54.1658	1.56247	2.70829	7.08322	1.11456	5.41658	0.739571	2.94787	0.562491	3.61452	0.739571	2.31246	0.291662	2.33329	0.302078	0.844009	0.20833		2.61307	0.0892857		1.28995	0.445945	-34.5706	0.198867			2.45094	2.19141	3.9422
FEMO-2016-7.01	Lapland	Kittila	3442605	7557737	Amphibolite	Tholeitic	51.2707	14.4487	10.1263	7.8839	11.1612	2.14093	0.263811	0.760994	0.0710261	0.162345	98.29	1.42	16.6404	55.8062	3.14544	5.37769	11.8715	1.47126	7.20408	0.760994	2.35401	0.456596	2.9831	0.679821	1.90756	0.284104	1.68433	0.263811	8.3897	0.882753		3.35366	0.524096		0.713178	-7.67652	1076.38				10.3853	4.41156	7.82779
FEMO-2016-8.01	Lapland	Kittila	3430642	7556533	Amphibolite	Tholeitic	45.21	14.12	14.81	4.5	16.05	1.61	0.5	1.82	0.19	0.28	99.09	0	38.4	135	7.6	8	19.9	2.96	15.6	1.45	6.29	1.02	6.96	1.43	4.39	0.6	3.66	0.58	2.85402	0.84		3.51562	0.229508		0.637601	-2.21642	347.62				9.88235	10.6592	11.6448
FEMO-2016-7.03	Lapland	Kittila	3442605	7557737	Amphibolite	Tholeitic	47.967	14.0657	13.655	5.62627	12.731	2.24845	0.195071	1.64271	0.112936	0.225872	98.47	2.56	27.2073	86.2421	3.49075	5.13346	12.8336	2.04312	10.5749	1.14989	4.0349	0.687883	4.84598	0.903489	3.19301	0.308008	2.55646	0.390143	0.929622	0.420944		3.16981	0.164659		0.815363	-0.11426	14.0134				4.95228	4.89587	7.47228
FEMO-2016-7.07	Lapland	Kittila	3442605	7557737	Amphibolite	Tholeitic	47.6279	13.1478	15.751	6.6752	11.0916	2.0765	0.182327	1.80301	0.14181	0.222844	98.72	1.26	32.515	114.461	8.60989	7.59696	19.6508	3.09956	14.6875	1.39784	5.36852	0.871118	5.93576	1.19526	3.57564	0.445688	3.04891	0.435559	1.19968	0.577369		3.52025	0.189369		0.635613	-0.564067	88.7438				6.79258	12.0756	11.0582
FEMO-2016-3.01	Lapland	Kittila	3390459	7528447	Amphibolite	Tholeitic	52.001	14.1638	11.7915	7.03668	10.2032	2.99561	0.25131	1.06555	0.100524	0.160838	99.77	0.52	21.7132	81.4244	5.42829	8.94663	19.4011	2.57341	11.5603	1.04545	3.12629	0.603144	3.76965	0.874558	2.50305	0.371939	2.16126	0.331729	0.474604	1.48775		3.75	0.688372		0.546991	0.0723875	-13.2338				17.503	7.61331	13.0228
FEMO-2016-3.02	Lapland	Kittila	3390459	7528447	Amphibolite	Tholeitic	49.6703	14.5472	10.303	9.15378	11.291	2.5808	0.625038	0.866988	0.08065	0.141138	99.26	0.8	21.2714	50.4063	2.01625	9.57719	18.1463	2.47999	11.4926	2.60096	3.71998	0.6452	4.01234	0.816581	2.37918	0.352844	2.13723	0.282275	0.154545	0.524225		2.36967	0.245283		1.62713	1.47259	-90.502				6.16735	2.82784	13.9406
FEMO 2017 1.01	Lapland	Savukoski	382216	7.52393e+06	Amphibolite	Tholeitic	46.7002	14.6122	12.8453	7.36195	10.652	2.52845	0.635667	1.13323	0.609265	0.245737	97.324	1.48	26.1984	82.2508	4.51872	29.0416	63.4651	7.48381	30.4633	1.78718	5.44277	0.822508	4.89443	1.00529	2.92447	0.406177	2.67061	0.406177	0.745658	2.35582		3.13953	0.882129		0.834161	0.0885031	-10.6098				27.7156	6.33761	42.2731
FEMO 2017 1.02	Lapland	Savukoski	382216	7.52393e+06	Amphibolite	Tholeitic	46.9931	15.0124	12.1087	7.25917	10.4653	2.65161	0.476887	1.14836	0.584767	0.217775	96.918	0.79	23.189	76.6246	4.21435	26.9194	57.6701	6.97687	28.1293	1.65348	4.99068	0.735999	4.46641	0.917479	2.69194	0.373041	2.41972	0.362959	1.79409	2.11726		3.30435	0.875		0.738714	-1.05538	142.867				24.9089	5.91073	39.184
FEMO 2017 4.12	Lapland	Savukoski	3443590	7592435	Upper amphibolite	Tholeitic	46.5131	10.6879	12.9428	10.9104	10.9002	1.94142	1.05969	0.843303	0.0819035	0.206276	96.087	1.06	25.1778	54.6024	9.12062	5.13667	7.85667	2.17398	10.516	1.09205	4.18618	0.758366	4.84343	1.01115	3.02335	0.434797	2.90201	0.45502	0.174532	0.84937		2.16867	0.292683		2.00838	1.83384	-91.3098				9.99259	12.7919	7.47695
FEMO 2017 4.13	Lapland	Savukoski	3443590	7592435	Upper amphibolite	Tholeitic	49.8722	13.1793	12.8073	5.71002	9.25868	3.36771	1.13396	1.24153	0.251321	0.181957	97.004	0.51	36.5924	118.624	12.6666	17.1904	23.6242	5.12696	22.2168	1.41745	5.95129	0.995232	6.37351	1.36719	4.29257	0.643383	4.48357	0.713753	0.645256	2.19152		3.24176	0.488789		0.773038	0.127783	-16.5299				25.7826	17.7652	25.0224
FEMO 2017 4.14	Lapland	Savukoski	3443590	7592435	Upper amphibolite	Tholeitic	48.1491	13.7468	13.3541	4.67291	8.82214	4.73334	1.1642	1.40187	0.296085	0.207461	96.548	0.68	64.0511	152.071	23.7674	18.5305	27.1915	6.55618	29.6085	2.02426	8.76171	1.58114	10.4738	2.31631	7.68412	1.23872	9.18469	1.61135	0.578898	2.73929		2.37421	0.298246		1.61975	1.04085	-64.26				32.227	33.3344	26.9731
FEMO 2017 4.1	Lapland	Savukoski	3443590	7592435	Upper amphibolite	Tholeitic	48.8312	15.1465	11.0257	7.53274	10.3676	2.46029	0.374612	0.671264	0.0860595	0.161994	96.658	1.19	15.187	48.5983	2.37929	5.34581	9.42605	1.67057	7.8061	0.840346	2.50079	0.445485	2.8754	0.617604	1.81231	0.253116	1.77181	0.28349	2.95274	0.779598		3.2	0.44		0.797212	-2.15552	270.383				9.17174	3.33702	7.78139
Average																																			1.27251			3.1071	0.339101
Standard deviation																																			1.90858			0.453036	0.244954
FEMO-2015-113.4	Lapland	Kittila	432311	7.53255e+06	Greenschist	Calc-alkaline	51.5578	14.1029	12.5427	6.11841	7.82136	4.70097	0.163157	1.83552	0.178453	0.19171	99.213	1.92	20.3947	105.033	7.95393	9.48353	23.7598	3.36512	16.1118	1.42763	4.69078	0.713814	4.38486	0.815787	2.24342	0.30592	1.93749	0.30592	12.2082	2.14144		5.15	1.10526		0.889094	-11.3191	1273.1	outlier			25.1934	11.1556	13.8043
FEMO-2015-113.5	Lapland	Kittila	432355	7.53253e+06	Greenschist	Calc-alkaline	50.2308	15.4397	15.2529	6.7341	6.15304	2.44876	0.339299	2.55252	0.219974	0.219974	99.591	3.61	31.4396	158.755	13.489	13.6965	34.1374	4.66925	22.8275	1.8677	6.64071	1.03761	6.43319	1.24513	3.52788	0.518806	3.11283	0.518806	0.921936	3.00907		5.0495	0.966667		0.851429	-0.0705066	8.28097	0.00497119			35.4009	18.9186	19.9366
FEMO-2015-113.6	Lapland	Kittila	432348	7.53247e+06	Greenschist	Calc-alkaline	48.3443	14.7888	12.9853	8.22399	11.2024	1.88595	0.42975	1.81381	0.16077	0.271041	100.106	2.97	20.4054	109.241	8.55378	8.86295	22.5696	3.29784	16.077	1.33975	4.74065	0.721403	4.53453	0.824461	2.26727	0.309173	1.95809	0.309173	0.825001	2.6795		5.35354	1.36842		0.968107	0.143105	-14.782	0.0204792			31.5235	11.9969	12.9009
FEMO-2015-113.2	Lapland	Kittila	432330	7.53251e+06	Greenschist	Calc-alkaline	48.7352	14.3846	16.1625	6.29259	7.40241	2.85537	0.560299	2.48902	0.190717	0.199337	99.272	7.14	21.9809	133.61	8.18898	13.361	33.7257	4.74099	21.8732	1.83175	5.71074	0.861998	4.95649	0.969748	2.58599	0.323249	2.04725	0.323249	2.0427	2.47824		6.07843	1.21053		1.27957	-0.763129	59.6394	0.582366			29.1558	11.4852	19.4483
FEMO-2016-7.08	Lapland	Kittila	3442605	7557737	Amphibolite	Calc-alkaline	51.0574	12.8843	14.2093	5.49801	9.36853	2.0448	0.751151	1.94047	0.166923	0.219086	98.14	4.07	45.2777	233.692	21.1783	21.9086	52.2676	7.49065	32.0283	2.24302	8.88862	1.471	9.08684	1.69009	4.77816	0.719853	4.0583	0.636392	0.416103	2.45167		5.16129	0.604113		0.893381	0.477278	-53.4238				28.8432	29.7031	31.8902
FEMO-2016-1.05	Lapland	Kittila	3389203	7534967	Amphibolite	Calc-alkaline	48.5619	15.3309	13.1498	7.43477	9.54251	2.57962	0.0943765	1.57294	0.115349	0.16778	98.55	4.57	17.6169	93.3278	10.4863	9.54251	22.6504	3.14588	15.1002	1.44711	3.82749	0.545286	3.50242	0.755012	1.89802	0.251671	1.41565	0.220212	0.494127	0.786471		5.29762	0.555556		0.946035	0.451907	-47.7686				9.25259	14.7073	13.8901
FEMO-2016-7.04	Lapland	Kittila	3442605	7557737	Amphibolite	Calc-alkaline	46.7384	13.3756	16.6712	5.55368	10.5784	2.50221	0.518751	2.56324	0.244118	0.25429	99	1.67	35.2954	166.814	13.3248	13.1213	32.4473	4.65858	20.75	1.83088	6.88616	1.05784	6.22501	1.34265	3.81434	0.518751	3.15319	0.467893	0.694151	1.33248		4.72622	0.422581		0.736261	0.0421104	-5.71949				15.6762	18.6883	19.0995
FEMO-2016-8.02	Lapland	Kittila	3430642	7556533	Amphibolite	Calc-alkaline	48.098	17.4765	9.81859	3.84905	14.4214	2.84407	0.462288	1.52756	0.331641	0.190945	99.02	0.49	24.3203	130.647	15.1751	36.6815	76.8804	9.69799	36.2795	1.7989	6.10019	0.864277	4.55253	0.854227	2.39184	0.331641	2.00995	0.281392	0.518732	5.7384		5.3719	2.855		0.975417	0.456684	-46.8194				67.5105	21.2834	53.3938
FEMO-2016-8.03	Lapland	Kittila	3430642	7556533	Amphibolite	Calc-alkaline	46.0248	12.8321	11.9685	9.83488	11.5316	2.90576	2.032	1.3208	0.37592	0.23368	99.06	1.56	18.8976	122.936	18.4912	20.5232	45.1104	5.54736	21.5392	1.36144	4.75488	0.6604	3.61696	0.65024	2.1336	0.254	1.80848	0.22352	2.38055	1.4732		6.50538	0.814607		1.48532	-0.895228	60.2716				17.3318	25.9344	29.8737
FEMO-2016-8.04	Lapland	Kittila	3430642	7556533	Amphibolite	Calc-alkaline	46.0682	14.4326	12.6094	7.39454	10.5927	3.92135	1.7315	1.48706	0.458339	0.234262	98.93	1.8	22.5096	125.279	28.5189	17.315	41.8617	5.48989	22.4077	1.48706	4.96025	0.702787	3.93153	0.712972	2.37318	0.30556	1.96577	0.295374	4.18842	2.57689		5.56561	1.31088		1.05435	-3.13407	297.252				30.3163	39.9984	25.2038
FEMO 2017 2.04	Lapland	Savukoski	382503	7.52374e+06	Amphibolite	Calc-alkaline	47.9335	9.73396	15.0095	9.34057	10.4098	1.8661	0.787795	1.76119	0.215862	0.323793	97.382	0.84	21.6871	117.009	7.65604	18.2575	42.1637	5.80003	25.5201	1.76523	5.87064	0.87757	4.77116	0.887657	2.44106	0.312697	1.95688	0.282436	6.39989	3.14715		5.39535	1.60825		0.984793	-5.41509	549.871				37.0253	10.7378	26.5757
FEMO 2017 10.2	Lapland	Kittilä	382933	7.53062e+06	Upper amphibolite	Calc-alkaline	47.1168	14.0425	11.7689	5.88446	11.4294	3.30229	0.483513	1.87027	0.211923	0.141968	96.252	2.69	22.1181	113.163	11.8306	10.8019	26.9533	4.01213	18.8261	1.60485	5.19519	0.792138	4.62938	0.905301	2.47929	0.318913	2.00606	0.28805	0.356191	1.27565		5.11628	0.635897		0.876357	0.520165	-59.3554				15.0077	16.5928	15.7233
FEMO 2017 10.4	Lapland	Kittilä	382933	7.53062e+06	Upper amphibolite	Calc-alkaline	46.7336	13.3422	14.5282	5.50047	11.2974	3.14897	0.195277	2.0683	0.237195	0.198344	97.25	2.13	25.9688	119.62	11.553	11.6553	28.9337	4.23271	19.6299	1.74829	5.73562	0.899706	5.28577	1.03262	2.87292	0.368061	2.27994	0.327166	0.364413	1.24732		4.6063	0.547085		0.695847	0.331433	-47.6302				14.6743	16.2034	16.9655
FEMO 2017 9.01	Lapland	Kittilä	382933	7.53062e+06	Upper amphibolite	Calc-alkaline	47.4631	10.3221	15.6632	6.88482	8.75782	2.00679	1.70731	1.70731	0.289183	0.261397	95.063	2.69	26.5513	160.543	9.365	25.0076	60.6152	7.91394	33.8581	2.07882	7.08035	0.998247	5.59842	1.05999	2.88154	0.370484	2.25378	0.319028	0.440981	4.01357		6.04651	1.78082		1.26486	0.823877	-65.1359				47.2185	13.1346	36.4012
FEMO 2017 9.02	Lapland	Kittilä	382933	7.53062e+06	Upper amphibolite	Calc-alkaline	48.6648	12.5466	15.3281	6.37913	8.68691	3.50701	0.8959	2.12134	0.326515	0.215661	98.672	0.76	25.7987	166.281	14.0079	25.5972	59.5587	7.85047	33.0546	2.01552	6.83263	0.977529	5.39153	1.02792	2.81166	0.362794	2.23723	0.332561	1.27659	3.66825		6.44531	1.63964		1.45537	0.178776	-12.2839				43.1559	19.6464	37.2593
FEMO 2017 9.03	Lapland	Kittilä	382933	7.53062e+06	Upper amphibolite	Calc-alkaline	51.2999	13.5042	14.206	4.94252	6.37615	4.71193	0.832107	2.22263	0.435102	0.198503	98.729	0.25	30.0762	193.49	18.1459	30.6777	67.2703	9.03287	37.896	2.31586	7.60927	1.10279	6.12551	1.16294	3.30838	0.421066	2.65673	0.380965	0.248593	4.75203		6.43333	1.78868		1.44943	1.20084	-82.8489				55.9063	25.4501	44.6546
FEMO 2017 9.04	Lapland	Kittilä	382933	7.53062e+06	Upper amphibolite	Calc-alkaline	49.9627	13.6536	15.6127	4.5512	6.98252	3.97853	0.984586	2.32684	0.472199	0.231076	98.756	0.46	35.1638	213.997	20.4955	31.9488	75.351	9.46408	39.283	2.5117	8.29865	1.2458	7.11313	1.36636	3.89816	0.50234	3.08437	0.452106	0.189672	5.73672		6.08571	1.85993		1.28294	1.09327	-85.2159				67.4908	28.7454	46.5048
FEMO 2017 9.05	Lapland	Kittilä	382933	7.53062e+06	Upper amphibolite	Calc-alkaline	50.209	13.8039	15.7645	4.56445	6.18312	4.49408	0.817379	2.35562	0.426284	0.315691	98.934	0.53	30.061	213.142	20.2083	28.0503	64.7469	8.28438	34.5853	2.13142	7.10808	1.0456	5.98205	1.18636	3.3982	0.44237	2.80503	0.402154	0.186309	5.29838		7.0903	1.88889		1.79455	1.60824	-89.6181				62.3339	28.3426	40.8301
FEMO 2017 4.08	Lapland	Savukoski	3443590	7592435	Upper amphibolite	Calc-alkaline	53.1787	14.4553	9.1831	8.35012	6.74511	4.72361	0.800474	0.500804	0.111741	0.136121	98.185	1.53	11.8852	67.0447	2.47862	9.97545	14.3232	2.77321	11.7836	0.77203	2.44815	0.375857	2.33641	0.467282	1.44248	0.203166	1.36121	0.203166	0.456142	2.96622		5.64103	2.1791		1.08598	0.629842	-57.9974				34.8967	3.47633	14.5203
FEMO 2017 4.11	Lapland	Savukoski	3443590	7592435	Upper amphibolite	Calc-alkaline	48.6609	13.1828	14.3457	4.94228	9.0926	3.35835	1.08971	1.43256	0.283705	0.186463	96.575	0.24	34.9869	146.364	9.25299	21.9546	37.2927	6.29565	26.6663	1.61401	6.54627	1.08269	6.68662	1.39346	4.18039	0.601495	3.96987	0.63157	0.819537	3.53879		4.18338	0.891414		0.563175	-0.256362	45.5208				41.6329	12.9776	31.9571
FEMO 2017 4.09	Lapland	Savukoski	3443590	7592435	Upper amphibolite	Calc-alkaline	56.5615	13.6101	9.99149	3.71917	6.60403	3.66891	1.70177	0.803139	0.230186	0.138715	97.029	0.5	20.0031	120.622	6.1316	26.4362	55.2849	6.62413	25.3305	1.24642	4.47305	0.67347	3.89005	0.794092	2.33202	0.331709	2.16114	0.341761	2.00278	8.70486		6.03015	4.02791		1.25735	-0.745422	59.285				102.41	8.59971	38.4807
Average																																			1.78243			5.58729	1.43149
Standard deviation																																			2.83256			0.71534	0.865753
LG11	La Grande	Yasinsky	53.6397	77.5833	Greenschist	Tholeitic	45.2487	15.8421	16.3483	6.68102	12.451	1.77148	0.900926	1.0224	0.101228	0.232824	100.6	1.22	23.2824	61.7488	2.9356	4.45401	11.3375	1.6905	8.50312	0.890803	3.74542	0.627611	4.35279	0.911049	2.59143	0.334051	2.65216	0.40491	1.07008	0.576997		2.65217	0.217557		1.24523	0.175157	-14.0662	0.0306801			6.7882	4.11725	6.48328
LG13	La Grande	Yasinsky	53.3804	77.5296	Greenschist	Tholeitic	50.9032	13.0793	13.4328	7.42338	8.66566	3.26225	1.02008	1.04028	0.0706989	0.242396	99.14	0.98	18.5837	52.5192	2.12097	2.82795	7.37288	1.17158	6.1609	0.727188	3.02995	0.494892	3.33295	0.747388	2.11087	0.262596	2.21186	0.333295	0.635467	0.302995		2.82609	0.136986		1.07088	0.435412	-40.6593	0.189583			3.56465	2.97471	4.11638
LG15	La Grande	Yasinsky	53.2758	77.4186	Greenschist	Tholeitic	50.1829	13.4257	12.8223	8.18616	10.7607	2.40355	0.241361	1.01573	0.0804536	0.201134	99.32	0.56	22.527	61.3459	2.61474	3.31871	8.44763	1.38783	7.84423	0.91516	3.05724	0.583289	4.1333	0.905103	2.73542	0.321814	2.30299	0.382155	0.680173	0.482722		2.72321	0.209607		1.16946	0.48929	-41.8389	0.239405			5.67908	3.66724	4.83073
LG17	La Grande	Yasinsky	53.2758	77.4186	Greenschist	Tholeitic	49.3497	16.0311	11.5585	6.97529	10.9052	2.64337	0.180915	0.954831	0.0603051	0.160814	98.82	0.5	21.4083	56.2848	2.3117	3.11576	8.14119	1.25636	6.93509	0.954831	2.93485	0.512594	3.78917	0.794017	2.62327	0.311576	2.59312	0.331678	1.58797	0.361831		2.62911	0.139535		1.27134	-0.316631	24.9054	0.100255			4.25683	3.24221	4.53532
LG19	La Grande	Yasinsky	53.2644	77.4153	Greenschist	Tholeitic	51.1942	15.066	11.2365	8.02176	10.6319	2.54963	0.513957	0.614733	0.0201552	0.161241	100.01	0.77	15.2172	33.256	1.10853	2.11629	5.13957	0.79613	4.23259	0.574423	2.40854	0.423259	2.77134	0.634888	1.70311	0.201552	1.70311	0.282173	3.7453	0.29225		2.18543	0.171598		1.972	-1.7733	89.9242	3.1446			3.43824	1.55475	3.08049
LG20	La Grande	Yasinsky	53.2644	77.4153	Greenschist	Tholeitic	51.5537	14.4837	11.3945	8.95354	10.4323	2.29916	0.992587	0.617835	0.0405137	0.172183	100.94	1.28	14.7875	32.411	1.11413	2.02569	4.76037	0.77989	4.25394	0.51655	1.9953	0.384881	2.8866	0.597578	1.63068	0.212697	1.64081	0.273468	2.67639	0.172183		2.19178	0.104938		1.95845	-0.717932	36.6581	0.515426			2.02569	1.56259	2.9486
LG21	La Grande	Yasinsky	53.2644	77.4153	Greenschist	Tholeitic	51.1186	14.9517	11.0622	7.84963	12.123	1.35373	0.24246	0.636457	0.0303075	0.191947	99.56	1.01	15.8609	36.3689	1.41435	2.4246	5.25329	0.848609	4.84919	0.555637	2.29326	0.424304	2.59634	0.575842	1.95988	0.24246	1.70732	0.252562	2.44378	0.373792		2.29299	0.218935		1.75934	-0.684442	38.9034	0.468461			4.39755	1.98366	3.52925
LG22	La Grande	Yasinsky	53.2472	77.4069	Greenschist	Tholeitic	50.8691	14.7146	11.0739	7.55452	12.7931	1.16301	0.212376	0.616902	0.0303394	0.182037	99.21	1.11	15.4731	33.3734	1.21358	2.32602	5.66336	0.839391	4.24752	0.596676	2.09342	0.3843	2.76089	0.627015	1.71924	0.232602	1.73946	0.283168	1.06394	0.293281		2.15686	0.168605		2.0346	0.97066	-47.7077	0.942181			3.45037	1.70207	3.38577
LG23	La Grande	Yasinsky	53.2472	77.4069	Greenschist	Tholeitic	50.0876	15.7313	9.9123	4.56681	16.2574	2.20975	0.115749	0.936512	0.0631356	0.189407	100.07	4.97	22.3079	58.9266	2.20975	2.94633	7.89196	1.29428	7.2606	0.862854	3.43037	0.599789	3.81971	0.925989	2.54647	0.357769	2.34654	0.336723	0.308996	0.452472		2.64151	0.192825		1.25721	0.948212	-75.4221	0.899106			5.3232	3.09923	4.28869
LG24	La Grande	Yasinsky	53.2472	77.4069	Greenschist	Tholeitic	49.206	15.1752	12.3519	8.32871	10.6882	2.23847	0.181497	0.967986	0.0604991	0.191581	99.39	0.82	22.183	57.4742	2.31913	3.12579	7.86489	1.29065	6.9574	0.645324	3.18629	0.574742	3.94253	0.877237	2.67205	0.332745	2.30905	0.362995	1.55461	0.44366		2.59091	0.19214		1.31631	-0.238301	18.1038	0.0567874			5.21953	3.25264	4.54991
LG26	La Grande	Yasinsky	53.2219	77.4181	Greenschist	Tholeitic	48.7049	15.3274	12.9577	8.36958	11.0418	2.07727	0.161341	0.968048	0.0403353	0.191593	99.84	0.83	16.0333	42.3521	1.71425	2.72263	6.45365	0.968048	4.94108	0.594946	2.39995	0.423521	2.83356	0.635281	1.70417	0.21176	1.69408	0.292431	0.76061	0.443689		2.64151	0.261905		1.25721	0.496598	-39.5001	0.246609			5.21986	2.40428	3.96308
LG29	La Grande	Yasinsky	53.2219	77.4181	Greenschist	Tholeitic	49.2145	14.724	12.9591	7.46285	9.83281	2.92463	0.151274	1.02866	0.0504247	0.201699	98.55	0.83	17.2452	43.3652	1.81529	2.72293	6.55521	1.04883	5.74841	0.71603	2.59183	0.484077	3.35828	0.705946	2.17835	0.272293	2.01699	0.292463	0.523297	0.383228		2.51462	0.19		1.41314	0.889841	-62.9692	0.791816			4.50856	2.54599	3.96351
LG31	La Grande	Yasinsky	53.2096	77.4459	Greenschist	Tholeitic	49.6898	16.5122	11.8601	8.46567	9.39608	1.96305	0.112467	0.74637	0.040897	0.153364	98.94	2.17	17.279	44.9867	1.73812	2.6583	6.13455	0.961079	5.00988	0.695249	2.6583	0.439642	3.15929	0.654352	1.94261	0.235158	1.687	0.255606	0.529818	0.398745		2.60355	0.236364		1.30118	0.77136	-59.2817	0.594996			4.69112	2.43776	3.86944
LG32	La Grande	Yasinsky	53.1975	77.4627	Greenschist	Tholeitic	49.2187	16.4401	11.1123	9.15367	11.0108	1.9789	0.0913337	0.750966	0.0608892	0.162371	99.98	1.46	16.846	43.6372	1.72519	2.13112	5.68299	1.04526	5.58151	0.710374	2.5066	0.405928	3.1155	0.679929	1.9586	0.263853	1.9383	0.274001	2.82256	0.385631		2.59036	0.198953		1.31697	-1.50559	114.323	2.26681			4.53684	2.41963	3.10207
LG35	La Grande	Yasinsky	53.1857	77.4674	Greenschist	Tholeitic	50.5024	14.4077	13.1527	7.35949	11.3455	1.6968	0.311247	0.773098	0.0502011	0.230925	99.83	0.4	16.3656	47.1891	2.20885	3.91569	8.03218	1.27511	6.12454	0.753017	2.51006	0.42169	3.05223	0.632534	1.9478	0.261046	1.8474	0.281126	1.80159	0.933741		2.88344	0.505435		1.02098	-0.780604	76.456	0.609342			10.9852	3.09797	5.69969
LG36	La Grande	Yasinsky	53.1857	77.4674	Greenschist	Tholeitic	48.472	13.6265	13.3751	9.92571	11.2129	1.83027	0.221242	0.784402	0.0502822	0.28158	99.78	0.56	15.7886	48.2709	2.31298	2.8158	5.73217	0.834685	4.02258	0.603386	1.88055	0.402258	2.73535	0.603386	1.83027	0.28158	1.92078	0.321806	0.897254	0.915136		3.05732	0.47644		0.888421	-0.00883289	0.994223	7.802e-05			10.7663	3.24401	4.09869
LG38	La Grande	Yasinsky	53.5071	76.611	Greenschist	Tholeitic	48.3987	14.5093	15.2784	9.78227	7.41361	0.953618	0.604983	1.19971	0.10254	0.276857	98.52	2.44	29.1212	82.0316	3.48634	6.56253	13.7403	1.86622	8.8184	0.98438	3.61965	0.758793	4.98342	1.05616	3.23	0.461428	2.84035	0.44092	3.90731	1.56886		2.8169	0.552347		1.07919	-2.82811	262.059	7.99823			18.4571	4.88968	9.55245
LG48	La Grande	Yasinsky	53.6429	76.0836	Greenschist	Tholeitic	45.0722	15.043	16.9162	7.77693	13.7374	0.227064	0.204357	0.874195	0.0681191	0.340596	100.26	11.95	24.8635	53.36	2.27064	6.69838	14.7591	2.29334	11.4667	1.32832	3.84873	0.703898	4.31421	0.885549	2.91777	0.408715	2.40688	0.408715	0.435124	0.465481		2.14612	0.193396		2.05887	1.62375	-78.8659	2.63656			5.47624	3.18462	9.75019
LG49	La Grande	Yasinsky	53.6429	76.0836	Greenschist	Tholeitic	51.4883	14.9499	12.416	7.61176	10.997	1.91561	0.476369	0.800705	0.060813	0.263523	100.98	1.35	19.3588	51.6911	2.0271	4.86504	10.0341	1.46965	6.48672	0.618266	2.39198	0.486504	2.97984	0.719621	2.43252	0.283794	2.00683	0.364878	1.96386	0.800705		2.67016	0.39899		1.22541	-0.738447	60.2613	0.545304			9.42005	2.84306	7.08157
LG01	La Grande	Yasinsky	53.6253	77.6906	Amphibolite	Tholeitic	51.7734	13.7858	15.2155	6.92354	10.3138	1.55218	0.173599	1.28668	0.102117	0.163387	101.29	2.1	28.1843	93.9478	4.1868	5.82068	14.5006	2.19552	11.5392	1.23562	4.14596	0.765879	4.79951	1.02117	3.135	0.41868	2.84907	0.469739	1.11368	0.735243		3.33333	0.258065		0.723549	-0.390129	53.9188				8.64992	5.87209	8.4726
LG02	La Grande	Yasinsky	53.6214	77.6889	Amphibolite	Tholeitic	50.2679	14.8658	13.3843	7.41758	10.779	1.51212	0.275861	1.01149	0.0817365	0.194124	99.79	2.12	24.5209	64.3675	2.65643	3.57597	9.19535	1.43039	7.76496	0.960403	3.40228	0.582372	3.954	0.878667	2.64622	0.34738	2.39079	0.418899	0.685668	0.378031		2.625	0.15812		1.27607	0.5904	-46.2671				4.44743	3.72572	5.2052
LG03	La Grande	Yasinsky	53.6214	77.6889	Amphibolite	Tholeitic	48.5129	14.6762	15.9501	7.21578	9.35605	2.33392	0.183452	1.32493	0.0815342	0.275178	99.91	1.88	26.091	79.4959	3.56712	3.56712	9.68219	1.66126	8.86685	0.835726	3.88307	0.693041	4.53534	1.02937	2.8537	0.377096	2.69063	0.417863	1.42513	0.509589		3.04687	0.189394		0.895675	-0.529453	59.1122				5.99516	5.00298	5.19232
LG04	La Grande	Yasinsky	53.6173	77.6916	Amphibolite	Tholeitic	50.7355	14.402	11.6732	8.34811	11.0668	1.9708	0.434587	0.626614	0.0404267	0.18192	99.48	1.05	14.7557	40.4267	1.41493	2.4256	4.64907	0.818641	4.548	0.596294	2.14262	0.33352	2.64795	0.6064	1.64739	0.202133	1.62717	0.252667	0.543024	0.21224		2.73973	0.130435		1.15279	0.609769	-52.8949				2.49694	1.98448	3.53072
LG05	La Grande	Yasinsky	53.6173	77.6916	Amphibolite	Tholeitic	50.8435	13.4675	11.803	8.05022	12.8118	1.79566	0.080704	0.625456	0.05044	0.211848	99.74	0.87	14.9302	50.44	1.31144	2.72376	5.5484	0.877656	5.044	0.625456	2.13865	0.373256	2.58253	0.595192	1.63426	0.20176	1.63426	0.262288	0.565161	0.292552		3.37838	0.179012		0.700846	0.135685	-19.3601				3.44179	1.83933	3.96471
LG07	La Grande	Yasinsky	53.5153	77.6611	Amphibolite	Tholeitic	49.0592	14.5361	13.4257	7.73238	10.3973	2.35202	0.726803	0.858032	0.0504725	0.211984	99.35	0.93	21.0975	51.4819	1.91795	2.82646	7.36898	1.20124	6.46048	0.686426	2.66495	0.484536	3.35137	0.767181	2.34192	0.29274	2.08956	0.302835	0.155917	0.272551		2.44019	0.130435		1.51766	1.36174	-89.7265				3.20649	2.68998	4.1142
LG08	La Grande	Yasinsky	53.6395	77.5683	Amphibolite	Tholeitic	51.5122	14.6815	12.9542	5.68971	11.6334	2.093	0.660413	0.670573	0.0609612	0.254005	100.21	1.58	20.422	43.6888	1.32083	1.82884	4.9785	0.751854	4.16568	0.52833	2.25556	0.548651	3.23094	0.751854	2.1946	0.335286	2.06252	0.325126	1.12209	0.243845		2.1393	0.118227		2.07448	0.952389	-45.9097				2.86876	1.85249	2.66206
LG10	La Grande	Yasinsky	53.6395	77.5683	Amphibolite	Tholeitic	49.9911	14.7332	12.955	8.01687	10.618	2.78406	0.436914	0.670613	0.0609648	0.203216	100.47	1.59	16.1557	37.595	1.42251	2.94663	6.90934	1.02624	5.18201	0.650291	2.35731	0.396271	2.76374	0.64013	1.57492	0.233698	1.88991	0.264181	0.474366	0.365789		2.32704	0.193548		1.69881	1.22445	-72.0766				4.3034	1.99511	4.28913
LG70	La Grande	Guyer	53.6348	74.1448	Amphibolite	Tholeitic	48.2114	14.0701	13.2128	9.8541	11.8007	1.40196	0.221894	0.584992	0.0302582	0.211808	99.6	0.85	13.5153	27.2324	1.10947	1.81549	3.63099	0.595078	3.32841	0.51439	1.65412	0.363099	2.17859	0.433701	1.523	0.221894	1.39188	0.252152	1.71355	0.191635		2.01493	0.137681		2.39162	0.67807	-28.3519				2.25453	1.55606	2.64264
LG86	La Grande	Yasinsky	53.5449	76.0254	Amphibolite	Tholeitic	50.3058	15.8408	8.39106	8.58337	11.1341	2.22682	0.840118	0.455486	0.0404876	0.16195	97.98	1.18	10.8304	26.3169	0.910971	1.92316	4.65607	0.668045	3.13779	0.404876	1.28548	0.182194	1.78145	0.313779	1.13365	0.121463	1.44743	0.16195	0.532262	0.313779		2.42991	0.216783		1.53296	1.0007	-65.2788				3.69152	1.27766	2.79936
LG87	La Grande	Yasinsky	53.5449	76.0254	Amphibolite	Tholeitic	51.4098	15.1385	8.81892	9.01196	10.5157	2.25553	1.24969	0.447042	0.0203201	0.162561	99.03	1.56	9.85525	24.3841	0.914404	2.13361	4.77522	0.650243	3.14962	0.365762	1.27001	0.162561	1.74753	0.335282	1.25985	0.142241	1.24969	0.152401	0.782133	0.457202		2.47423	0.365854		1.46855	0.686412	-46.741				5.37885	1.28247	3.10569
LG52	La Grande	La Forge	54.2044	72.5043	Upper Amphibolite	Tholeitic	48.0535	15.7644	12.8244	9.15449	8.70843	3.1326	0.628548	0.780616	0.0405515	0.182482	99.27	1.35	18.9578	45.6204	2.43309	5.47445	10.8475	1.6322	7.29926	0.76034	2.55474	0.547445	3.04136	0.699513	2.24047	0.293998	2.06812	0.314274	0.35703	0.233171		2.40642	0.112745		1.56874	1.21171	-77.241				2.74319	3.41247	7.96863
LG54	La Grande	La Forge	54.2044	72.5043	Upper Amphibolite	Tholeitic	52.5605	14.2014	12.0788	6.81265	7.5303	3.23449	0.758084	1.0411	0.0606468	0.18194	98.46	1.05	25.3706	58.6252	4.64958	7.17653	16.2735	2.24393	10.1078	1.10175	3.4973	0.646899	4.30592	0.919809	2.8504	0.363881	2.66846	0.404312	0.128585	0.50539		2.31076	0.189394		1.72739	1.5988	-92.5561				5.94576	6.52116	10.4462
LG59	La Grande	La Forge	54.1851	72.5195	Upper Amphibolite	Tholeitic	47.7942	14.1968	15.2072	7.67941	9.97313	2.54633	0.87909	1.04076	0.0707314	0.222299	99.61	1.03	21.1184	38.397	2.12194	2.9303	7.37627	1.19233	5.8606	0.78815	2.6979	0.535538	3.57699	0.707314	2.2432	0.313239	2.18257	0.313239	0.233815	0.212194		1.81818	0.0972222		3.05259	2.81878	-92.3404				2.4964	2.97608	4.26536
LG56	La Grande	La Forge	54.1851	72.5195	Upper Amphibolite	Tholeitic	61.5936	17.0814	6.63161	1.98948	6.65171	4.0694	0.251197	1.66795	0.653113	0.110527	100.7	0.48	9.04311	25.1197	6.33017	10.5503	23.2106	2.99427	12.5599	0.894263	2.29092	0.331581	1.55742	0.331581	1.03493	0.120575	0.994742	0.140671	0.630582	0.331581		2.77778	0.333333		1.11564	0.485058	-43.478				3.90095	8.87822	15.357
Average																																			1.17268			2.56106	0.222847
Standard deviation																																			0.974513			0.349574	0.114172
LG27	La Grande	Yasinsky	53.2219	77.4181	Greenschist	Calc-alkaline	54.1118	17.8827	11.2346	5.41118	4.19495	2.91688	2.53553	1.59759	0.329824	0.164912	100.38	2.99	29.0658	205.11	9.37938	31.6425	72.1491	8.95679	36.1776	1.70066	6.52434	0.814254	5.25658	1.07193	2.85504	0.401974	3.04057	0.391666	0.776872	4.23618		7.05674	1.39322		1.77594	0.999069	-56.2557	0.998138			49.8374	13.1548	46.059
LG28	La Grande	Yasinsky	53.2219	77.4181	Greenschist	Calc-alkaline	61.1539	16.5541	8.02898	3.28044	4.56629	4.54604	1.19473	0.931483	0.242995	0.0911233	100.59	1.24	19.6421	179.209	8.2011	31.2857	69.4562	8.2416	32.5006	1.59972	4.99153	0.688487	3.84743	0.769486	2.05534	0.25312	2.05534	0.29362	3.39409	5.65977		9.12371	2.75369		3.12243	-0.271663	8.70039	0.073801			66.5855	11.5022	45.5395
LG33	La Grande	Yasinsky	53.1975	77.4627	Greenschist	Calc-alkaline	60.6621	11.9014	10.4451	5.18239	6.69895	2.91259	0.140608	1.22529	0.200868	0.140608	99.51	0.43	24.2046	99.4297	4.61996	15.0651	43.2871	4.90118	20.2877	1.40608	4.4894	0.743212	4.58983	0.873776	2.61128	0.311345	2.48072	0.341476	1.66069	1.67725		4.10788	0.676113		0.541091	-1.1196	206.915	1.2535			19.7323	6.47961	21.9288
LG34	La Grande	Yasinsky	53.1857	77.4674	Greenschist	Calc-alkaline	55.3949	13.5477	11.942	5.27857	8.87121	2.58911	0.260918	1.24438	0.220777	0.130459	99.48	0.35	24.1851	104.367	4.61624	19.9703	44.9582	6.16168	26.1922	1.59561	5.09794	0.732577	4.54599	0.923248	2.78982	0.361271	2.49879	0.391377	0.210705	1.95688		4.31535	0.783133		0.602938	0.392233	-65.0536	0.153846			23.0222	6.47439	29.0688
LG39	La Grande	Yasinsky	53.514	76.5584	Greenschist	Calc-alkaline	71.3596	14.4467	4.7196	1.53207	3.04358	4.44198	1.20304	0.575812	0.133671	0.143953	101.6	2.79	25.8087	231.353	8.94565	30.0245	57.4784	6.992	26.0144	1.15162	4.50367	0.719765	4.86356	0.966542	3.01273	0.452424	2.92019	0.514118	2.94286	6.32365		8.96414	2.16549		3.00373	0.0608714	-2.02653	0.00370533			74.3959	12.5465	43.7038
LG40	La Grande	Yasinsky	53.514	76.5584	Greenschist	Calc-alkaline	58.1565	16.3237	9.35334	4.7659	5.54272	3.38022	0.524879	0.913289	0.272937	0.136468	99.37	4.71	27.8186	174.26	9.02791	21.415	44.6147	5.66869	23.0947	1.37518	4.304	0.81881	4.79739	1.03926	3.08629	0.4304	2.88683	0.419903	1.44262	2.44593		6.26415	0.847273		1.36702	-0.0756006	5.53031	0.00571544			28.7757	12.6619	31.1718
LG41	La Grande	Yasinsky	53.514	76.5584	Greenschist	Calc-alkaline	59.6559	16.3873	8.29186	3.13271	6.15169	2.95695	1.50949	0.909831	0.268814	0.165424	99.43	3.26	25.1237	169.559	8.89153	18.6102	41.3559	5.27288	20.4712	1.23034	4.0839	0.692712	4.35271	0.878814	2.71915	0.341186	2.37797	0.372203	2.13234	2.22288		6.74897	0.934783		1.61024	-0.522107	32.4243	0.272595			26.1515	12.4706	27.089
LG42	La Grande	Yasinsky	53.5383	76.4883	Greenschist	Calc-alkaline	59.6809	17.6048	8.99344	3.7378	5.18336	3.14925	1.14612	0.980915	0.299437	0.123905	100.9	3.18	25.194	173.467	9.08637	21.6834	45.0188	5.51377	21.9931	1.31133	4.23342	0.774406	4.57416	0.877661	2.82916	0.382041	2.45745	0.413017	1.79937	2.32322		6.88525	0.945378		1.68252	-0.116856	6.94533	0.0136554			27.332	12.7439	31.5624
LG44	La Grande	Yasinsky	53.5467	76.4451	Greenschist	Calc-alkaline	53.295	14.2086	15.0682	4.08561	7.37231	2.36642	0.991065	2.16416	0.546097	0.222484	100.32	1.12	35.6985	209.337	10.1129	24.1698	54.4074	7.28129	30.6421	2.04281	6.01718	1.04163	6.1891	1.27423	4.18674	0.525871	3.59008	0.616887	0.4471	2.21473		5.86402	0.616901		1.18252	0.735418	-62.1909	0.54084			26.0556	14.1836	35.1817
LG45	La Grande	Yasinsky	53.5934	76.0919	Greenschist	Calc-alkaline	55.6955	15.8985	11.6454	4.85057	6.48093	3.36198	0.496196	1.21517	0.222782	0.232908	100.1	1.25	24.2022	148.859	7.49358	14.7846	31.392	4.23286	17.3162	1.15442	3.99995	0.739231	4.24298	0.840496	2.61263	0.334173	2.21769	0.354426	0.988079	1.74175		6.15063	0.785388		1.31319	0.325114	-24.7575	0.105699			20.4912	10.5099	21.5206
LG68	La Grande	Guyer	53.6584	73.8395	Amphibolite	Calc-alkaline	61.5534	15.4886	8.13027	3.27817	7.72927	2.98745	0.210525	0.691724	0.10025	0.1203	100.29	0.25	14.2355	89.2224	3.30825	3.8095	7.11774	0.952374	4.812	0.731824	2.1654	0.401	2.65662	0.541349	1.83457	0.210525	1.55387	0.2807	0.942612	1.73432		6.26761	1.11613		1.36868	0.426066	-31.1297				20.4038	4.6399	5.54512
LG69	La Grande	Guyer	53.6584	73.8395	Amphibolite	Calc-alkaline	54.9022	15.8236	11.8298	4.80268	7.71462	2.72995	0.566211	0.738096	0.0909982	0.171885	99.37	1.09	15.1664	94.0314	3.3366	8.08873	16.9863	2.07274	8.79649	0.808873	2.41651	0.424658	2.58839	0.566211	1.64808	0.242662	1.6683	0.323549	0.346675	1.70874		6.2	1.02424		1.33646	0.989783	-74.0602				20.1029	4.67966	11.774
LG72	La Grande	Guyer	53.617	74.2675	Amphibolite	Calc-alkaline	60.5958	16.5905	8.31549	4.6939	3.6924	3.28775	2.83253	0.758712	0.141626	0.111278	101.02	1.16	16.4893	147.696	5.96854	4.24879	9.10455	1.18359	4.85576	0.647434	1.55789	0.465343	2.82241	0.677783	1.6894	0.354066	2.08393	0.374298	0.206443	3.41926		8.95706	1.64078		2.99851	2.79207	-93.1152				40.2266	8.37102	6.18455
LG73	La Grande	Guyer	53.617	74.2675	Amphibolite	Calc-alkaline	60.9736	16.2868	8.19428	4.83514	4.43815	2.80947	3.06395	0.732905	0.193405	0.13233	101.66	1.79	26.3642	157.778	7.02367	31.9628	45.1958	6.33148	24.6337	0.92631	4.71298	0.631112	4.46868	0.834697	2.88072	0.346094	2.98252	0.437707	1.88996	2.77893		5.98456	0.931741		1.23657	-0.653394	52.8394				32.6933	9.85087	46.5252
LG75	La Grande	Guyer	53.617	74.2675	Amphibolite	Calc-alkaline	47.9986	16.9052	13.1317	5.61493	12.8801	2.28421	1.08676	0.915697	0.120751	0.322003	101.26	0.63	16.1002	93.5822	3.72316	10.9682	21.3327	2.74709	12.377	0.774821	2.61628	0.392442	2.69678	0.553443	1.68046	0.221377	1.68046	0.301878	0.600483	1.29808		5.8125	0.772455		1.15982	0.559332	-48.226				15.2715	5.22183	15.9654
LG76	La Grande	Guyer	53.6156	74.2727	Amphibolite	Calc-alkaline	61.0329	15.4844	6.95795	4.53473	7.87294	3.36837	0.764167	0.6234	0.0904935	0.120658	100.85	0.55	16.2888	74.4058	3.92139	6.63619	16.9927	2.43327	11.1609	0.89488	2.51371	0.341864	2.6947	0.502742	1.46801	0.211152	1.85009	0.251371	0.428797	1.59872		4.5679	0.86413		0.683169	0.254372	-37.2342				18.8085	5.49984	9.65967
LG77	La Grande	Guyer	53.6156	74.2727	Amphibolite	Calc-alkaline	53.3949	16.8748	9.61107	5.95403	10.2256	3.64697	0.735439	0.735439	0.0906705	0.151118	101.42	0.75	14.5073	80.596	3.32459	7.65662	21.2572	2.17609	10.1752	0.735439	2.4884	0.302235	2.77049	0.473502	1.43058	0.181341	1.66229	0.221639	0.463452	1.69252		5.55556	1.01818		1.05017	0.586716	-55.8688				19.912	4.66281	11.145
LG78	La Grande	Guyer	53.5979	74.3396	Amphibolite	Calc-alkaline	69.9618	15.279	4.53345	1.08561	3.08596	4.62392	1.2565	0.512651	0.120624	0.0804159	100.54	0.52	23.4211	175.91	6.83535	22.2149	46.5407	5.15667	19.2998	0.914731	3.61872	0.522703	3.84991	0.784055	2.50295	0.331716	2.7844	0.371924	0.796722	4.30225		7.51073	1.54513		2.03661	1.23988	-60.8799				50.6147	9.58675	32.3361
LG79	La Grande	Guyer	53.5979	74.3396	Amphibolite	Calc-alkaline	69.7504	15.2548	4.56639	1.14411	3.06099	4.4861	1.33479	0.511837	0.110396	0.0702522	100.29	0.36	19.5702	170.612	7.22594	27.9002	48.0726	5.89115	22.4807	0.993566	4.14488	0.521873	3.66315	0.68245	2.07746	0.270973	2.10757	0.270973	0.351447	4.36567		8.71795	2.07143		2.8255	2.47405	-87.5616				51.3608	10.1346	40.6116
LG85	La Grande	Guyer	53.4867	75.3225	Amphibolite	Calc-alkaline	52.3572	16.4828	6.79725	4.04161	15.105	2.29637	0.336801	0.367419	0.142885	0.132679	98.06	1.98	9.8999	46.948	2.44946	7.24632	15.5132	2.07183	8.36898	0.653189	1.81668	0.214328	1.94936	0.265358	1.07164	0.102061	1.28597	0.132679	0.575479	1.15329		4.74227	0.896825		0.741762	0.166283	-22.4173				13.5681	3.43543	10.5478
LG88	La Grande	Yasinsky	53.5449	76.0254	Amphibolite	Calc-alkaline	62.1499	16.3766	6.69307	2.91932	5.89966	4.02805	0.345842	0.742544	0.203437	0.0915465	99.45	1.68	19.0213	181.059	8.03575	21.4626	45.1629	5.35038	22.6832	1.14942	3.70255	0.488248	3.57031	0.620482	2.05471	0.233952	1.82076	0.22378	1.0752	2.77691		9.51872	1.52514		3.42708	2.35188	-68.6263				32.6695	11.2703	31.241
LG57	La Grande	La Forge	54.1851	72.5195	Upper Amphibolite	Calc-alkaline	50.5143	17.0233	10.3049	6.04151	8.40558	3.8896	0.616274	1.01029	0.303086	0.111131	98.22	1	12.6286	69.7097	2.42469	8.4864	21.6201	3.29353	15.3563	1.11131	3.37436	0.454629	2.69746	0.515246	1.4245	0.151543	1.11131	0.14144	1.22798	0.575863		5.52	0.518182		1.03546	-0.192515	18.5922				6.77486	3.40068	12.3528
Average																																			1.12273			6.58344	1.1739
Standard deviation																																			0.873763			1.61905	0.567453
																																											RMSD	0.85172
																																											NRMSD	0.230406
																																											NRMSD (%)	23.0406
																																											σAu analyses (%)	3.31427
																																											σΔAu (%)	23.2778
[truncated: 16 more columns]

## Sheet: G47658
Patten, C.G.C., et al., 2020, Gold mobilization during metamorphic devolatilization of Archean and Paleoproterozoic metavolcanic rocks: Geology, v. 48, https://doi.org/10.1130/G47658.1
